# Supplementary material
Source: HighWire-hosted journal article supplement (https://bmjopen.bmj.com/content/10/8/e037582)
Supplement: inline-supplementary-material-1 [file inline-supplementary-material-1.pdf]

Search strategy for the Pubmed database is as follows, and filters in article types, publication dates and species, we chose clinical trials, 10 years and humans respectively.

Table 1 Search strategy for the Pubmed database

|                                        |                                                     |
|----------------------------------------|-----------------------------------------------------|
| 1. probiotics. Mesh.                   | 27. magnetic resonance imaging. Mesh.               |
| 2. culturelle. ti, ab                  | 28. fMRI. ti, ab                                    |
| 3. bifidobacteria. ti, ab              | 29. MRI. ti, ab                                     |
| 4. lactobacilli. ti, ab                | 30. MR. ti, ab                                      |
| 5. escherichia coli. ti, ab            | 31. functional magnetic resonance imaging. ti, ab   |
| 6. yogurt. ti, ab                      | 32. NMR Imaging. ti, ab                             |
| 7. yeast. ti, ab                       | 33. neuroimaging. ti, ab                            |
| 8. saccharomyces. ti, ab               | 34. brain activity. ti, ab                          |
| 9. bacillus. ti, ab                    | 35. MR tomography. ti, ab                           |
| 10. enterococcus. ti, ab               | 36. independent component analysis. ti, ab          |
| 11. streptococcus. ti, ab              | 37. functional network connectivity. ti, ab         |
| 12. fermented milk. ti, ab             | 38. amplitude of low frequency fluctuations. ti, ab |
| 13. sour milk. ti, ab                  | 39. regional homogeneity. ti, ab                    |
| 14. 1 or 2-13                          | 40. functional connectivity. ti, ab                 |
| 15. gastrointestinal microbiome. Mesh. | 41. central. ti, ab                                 |
| 16. gut microbiota. ti, ab             | 42. brain. ti, ab                                   |
| 17. gut microbiome. ti, ab             | 43. neuro. ti, ab                                   |
| 18. gut microflora. ti, ab             | 44. ALFF. ti, ab                                    |
| 19. intestinal microflora. ti, ab      | 45. FALFF. ti, ab                                   |
| 20. intestinal bacteria. ti, ab        | 46. ReHo. ti, ab                                    |
| 21. intestinal microbiome. ti, ab      | 47. ROI. ti, ab                                     |
| 22. microbiome. ti, ab                 | 48. ICA. ti, ab                                     |
| 23. microbiota. ti, ab                 | 49. FC. ti, ab                                      |
| 24. flora. ti, ab                      | 50. 27 or 28-49                                     |
| 25. bacteria. ti, ab                   | 51. 14 or 26                                        |
| 26. 15 or 16-25                        | 52. (Final search) 50 and 51                        |
